# Supplementary material for: Characterizing the Flavor Precursors and Liberation Mechanisms of Various Dry-Aging Methods in Cull Beef Loins Using Metabolomics and Microbiome Approaches
Source: MDPI journal article supplement (doi:10.3390/metabo12060472), 2022-05-24
Supplement: s1 [file s1]

Supplementary Data

# Metabolomics and Microbiome Approaches to Elucidate Flavor Precursor and Liberation Mechanisms Related to Dry-aged Cull Beef Loins

Derico Setyabrata <sup>1</sup>, Kelly Vierck <sup>2</sup>, Tessa R. Sheets <sup>1</sup>, Jerrad F. Legako <sup>2</sup>, Bruce R. Cooper <sup>3</sup>, Timothy A. Johnson <sup>1</sup>, and Yuan H. Brad Kim<sup>1,\*</sup>

<sup>1</sup> Department of Animal Science, Purdue University, West Lafayette, IN 47907, U.S.A.; [dsetyabr@purdue.edu](mailto:dsetyabr@purdue.edu) / [dericos@uark.edu](mailto:dericos@uark.edu) (D.S.), [sheets27@purdue.edu](mailto:sheets27@purdue.edu) (T.R.S.), [john2185@purdue.edu](mailto:john2185@purdue.edu) (T.A.J)

<sup>2</sup> Bindley Bioscience Center, Purdue University, West Lafayette, IN 47907, U.S.A.; [brcooper@purdue.edu](mailto:brcooper@purdue.edu) (B.R.C.)

<sup>3</sup> Department of Animal and Food Science, Texas Tech University, Lubbock, TX, 79409, USA; [kelly.vierck@ttu.edu](mailto:kelly.vierck@ttu.edu) / [vierck@uark.edu](mailto:vierck@uark.edu) (K.V.), [jerrad.legako@ttu.edu](mailto:jerrad.legako@ttu.edu) (J.F.L.)

\* Correspondence: [bradkim@purdue.edu](mailto:bradkim@purdue.edu); Tel.: +1-765-496-1631

**Table S1.** Effect of different aging methods on free fatty acid profiles composition of cull cow beef loins (*M. longissimus lumborum*) after 28 days of aging.

| Fatty Acid<br>(%FA/total FA) | Type | WA                  | DA                  | DWA                 | UDA                 | SEM   | P-value |
|------------------------------|------|---------------------|---------------------|---------------------|---------------------|-------|---------|
| C10:0                        | SFA  | 0.045               | 0.043               | 0.047               | 0.048               | 0.003 | 0.6764  |
| C12:0                        | SFA  | 0.056               | 0.052               | 0.059               | 0.060               | 0.003 | 0.3028  |
| C13:1                        | MUFA | 0.016 <sup>c</sup>  | 0.048 <sup>b</sup>  | 0.167 <sup>a</sup>  | 0.153 <sup>ab</sup> | 0.039 | 0.0184  |
| C14:0                        | SFA  | 2.643               | 2.434               | 2.790               | 2.824               | 0.160 | 0.2895  |
| C14:1n5                      | MUFA | 1.103               | 0.873               | 1.117               | 1.040               | 0.115 | 0.4254  |
| C15:0                        | SFA  | 0.273 <sup>a</sup>  | 0.263 <sup>a</sup>  | 0.326 <sup>a</sup>  | 0.182 <sup>b</sup>  | 0.024 | 0.0009  |
| C16:0                        | SFA  | 28.148              | 28.541              | 28.480              | 29.274              | 0.489 | 0.4313  |
| C16:1trans                   | MUFA | 0.017               | 0.036               | 0.031               | 0.024               | 0.008 | 0.3438  |
| C16:1n7                      | MUFA | 5.509               | 4.756               | 5.603               | 5.016               | 0.269 | 0.0982  |
| C17:0                        | SFA  | 0.698               | 0.699               | 0.658               | 0.676               | 0.026 | 0.6366  |
| C17:1                        | MUFA | 0.790 <sup>a</sup>  | 0.688 <sup>b</sup>  | 0.710 <sup>b</sup>  | 0.649 <sup>b</sup>  | 0.027 | 0.0049  |
| C18:0                        | SFA  | 11.083              | 12.056              | 11.137              | 11.899              | 0.377 | 0.1642  |
| C18:1trans                   | MUFA | 0.352               | 0.447               | 0.369               | 0.376               | 0.056 | 0.4618  |
| C18:1n9                      | MUFA | 42.591              | 42.012              | 40.852              | 40.480              | 0.615 | 0.0669  |
| C18:1n7                      | MUFA | 1.789               | 1.625               | 1.851               | 1.794               | 0.138 | 0.6879  |
| C18:2trans                   | PUFA | 0.061 <sup>bc</sup> | 0.128 <sup>b</sup>  | 0.196 <sup>a</sup>  | 0.051 <sup>c</sup>  | 0.021 | 0.0021  |
| C18:2n6                      | PUFA | 2.820               | 3.225               | 3.373               | 3.189               | 0.236 | 0.3802  |
| C18:3n3                      | PUFA | 0.061 <sup>c</sup>  | 0.069 <sup>ab</sup> | 0.062 <sup>bc</sup> | 0.070 <sup>a</sup>  | 0.003 | 0.0371  |
| C18:3n6                      | PUFA | 0.258               | 0.245               | 0.255               | 0.242               | 0.011 | 0.6406  |
| C19:0                        | SFA  | 0.119               | 0.102               | 0.106               | 0.098               | 0.006 | 0.1008  |
| C19:1                        | MUFA | 0.023               | 0.023               | 0.022               | 0.027               | 0.003 | 0.7092  |
| C20:0                        | SFA  | 0.150               | 0.191               | 0.152               | 0.175               | 0.014 | 0.1581  |
| C20:1n9                      | MUFA | 0.072               | 0.071               | 0.060               | 0.063               | 0.005 | 0.2623  |
| C20:1n11                     | MUFA | 0.427               | 0.343               | 0.377               | 0.341               | 0.028 | 0.0621  |
| C20:2                        | PUFA | 0.034 <sup>ab</sup> | 0.025 <sup>b</sup>  | 0.037 <sup>a</sup>  | 0.037 <sup>a</sup>  | 0.003 | 0.0294  |
| C20:3n6                      | PUFA | 0.094               | 0.107               | 0.122               | 0.132               | 0.015 | 0.3124  |
| C20:4n6                      | PUFA | 0.532               | 0.573               | 0.710               | 0.716               | 0.096 | 0.4286  |
| C20:5                        | PUFA | 0.030 <sup>b</sup>  | 0.042 <sup>ab</sup> | 0.046 <sup>a</sup>  | 0.058 <sup>a</sup>  | 0.006 | 0.0136  |

**Table S1.** Continued

|                                                          |      |        |        |        |        |       |        |
|----------------------------------------------------------|------|--------|--------|--------|--------|-------|--------|
| C22:3                                                    | PUFA | 0.006  | 0.007  | 0.006  | 0.009  | 0.001 | 0.129  |
| C22:4                                                    | PUFA | 0.004  | 0.004  | 0.010  | 0.004  | 0.003 | 0.4551 |
| C22:5n3                                                  | PUFA | 0.122  | 0.150  | 0.180  | 0.166  | 0.021 | 0.2425 |
| C22:6n3                                                  | PUFA | 0.004  | 0.006  | 0.011  | 0.009  | 0.002 | 0.0759 |
| C24:0                                                    | SFA  | 0.003  | 0.006  | 0.004  | 0.005  | 0.001 | 0.1229 |
| C24:1n9                                                  | MUFA | 0.107  | 0.119  | 0.138  | 0.139  | 0.020 | 0.6374 |
| SFA%                                                     |      | 44.143 | 43.599 | 43.611 | 45.235 | 0.741 | 0.3808 |
| MUFA%                                                    |      | 51.342 | 52.089 | 51.678 | 50.144 | 0.712 | 0.2858 |
| PUFA%                                                    |      | 4.515  | 4.312  | 4.711  | 4.656  | 0.354 | 0.5164 |
| Total Free Fatty Ac-<br>ids Wet Basis (mg/g<br>wet meat) |      | 82.04  | 83.09  | 73.71  | 72.03  | 13.14 | 0.6804 |
| Total Free Fatty Ac-<br>ids Dry Basis (mg/g<br>dry meat) |      | 260.26 | 208.29 | 213.35 | 154.21 | 38.62 | 0.0689 |

<sup>a-c</sup> Different superscript letters indicated a significant difference between the different aging methods ( $P < 0.05$ )

Different aging treatments: Wet-aging (WA), Conventional dry-aging (DA), Dry-aging in water-permeable bag (DWA) and UV-light dry-aging (UDA)

SFA: Saturated fatty acid, MUFA: Monounsaturated fatty acid, PUFA: Polyunsaturated fatty acid

SEM: Standard Error of Means

**Table S2.** Top 10 metabolites loading score from each principal component from cull cow beef loins (*M. longissimus lumborum*) after 28 days of aging using different aging methods Different aging treatments: Wet-aging (WA), Conventional dry-aging (DA), Dry-aging in water permeable bag (DWA) and UV-light dry-aging (UDA)

| Principal Component | Compound Name                  | Loading score (Absolute Value) |
|---------------------|--------------------------------|--------------------------------|
| PC1                 | Ile-Ile                        | 0.212                          |
|                     | Leu-Leu-Leu                    | 0.194                          |
|                     | Lysophosphatidylethanolamine   | 0.193                          |
|                     | Lactoylglutathione             | 0.191                          |
|                     | Unknown3                       | 0.185                          |
|                     | Unknown1                       | 0.179                          |
|                     | Unknown4                       | 0.176                          |
|                     | Proline                        | 0.168                          |
|                     | Lysophosphatidylethanolamine   | 0.167                          |
|                     | Tetrahydrofurfuryl cinnamate   | 0.166                          |
| PC2                 | Glutathionyl acetate           | 0.246                          |
|                     | Asp-Cys                        | 0.242                          |
|                     | Glutathionyl acetate           | 0.241                          |
|                     | Thioprolin                     | 0.240                          |
|                     | Unknown16                      | 0.240                          |
|                     | Unknown14                      | 0.226                          |
|                     | His-Glu                        | 0.215                          |
|                     | Unknown5                       | 0.184                          |
|                     | Phenylethyl glucopyranoside    | 0.180                          |
| PC3                 | Gln-Gln                        | 0.168                          |
|                     | Unknown13                      | 0.174                          |
|                     | Hyp-Hyp                        | 0.161                          |
|                     | Tyromycinic acid               | 0.152                          |
|                     | Histidine                      | 0.152                          |
|                     | Linalooloxide apiosylglucoside | 0.148                          |
|                     | Unknown12                      | 0.147                          |
|                     | Coumaric acid                  | 0.143                          |
|                     | His-Glu                        | 0.138                          |
|                     | Demethoxymatteucinol           | 0.134                          |
| PC4                 | Unknown2                       | 0.131                          |
|                     | Erysothiopine                  | 0.301                          |
|                     | Coumaric acid                  | 0.291                          |
|                     | Deoxyfructosyl Tyrosine        | 0.286                          |
|                     | Unknown9                       | 0.251                          |
|                     | Unknown6                       | 0.241                          |
|                     | Tyromycinic acid               | 0.223                          |
|                     | Lysophosphatidylethanolamine   | 0.220                          |
|                     | Lysophosphatidylethanolamine   | 0.210                          |

---

|     |                      |       |
|-----|----------------------|-------|
|     | Oxoursadienoate      | 0.198 |
|     | Unknown11            | 0.184 |
| PC5 | Acetyl-Lysine        | 0.316 |
|     | Unknown9             | 0.290 |
|     | Triethyl citrate     | 0.285 |
|     | Histidine            | 0.279 |
|     | Tetraethylene glycol | 0.240 |
|     | Unknown11            | 0.225 |
|     | Trimethyloxazoline   | 0.215 |
|     | Unknown12            | 0.204 |
|     | Lactoylglutathione   | 0.192 |
|     | Val-Ser              | 0.187 |

---

**Table S3.** Potential microbial marker correlated with changes observed in cull cow beef loins (*M. longissimus lumbrorum*) after 28 days of aging using different aging methods identified through both LEFSE ( $P < 0.05$ ,  $FDR < 0.05$ ) and ANCOM ( $P < 0.05$ ,  $FDR < 0.05$ ) analyses. Different aging treatments: Wet-aging (WA), Conventional dry-aging (DA), Dry-aging in water permeable bag (DWA) and UV-light dry-aging (UDA)

| ASVs                           | Enriched Treatment |
|--------------------------------|--------------------|
| Pseudomonas ASV1               | DA                 |
| Unclassified Yersiniaceae ASV1 | WA                 |
| Carnobacterium                 | WA                 |
| Unclassified Lactobacillales   | WA                 |
| Brochothrix                    | WA                 |

**Table S4.** Co-occurrence analysis results showing unique ASVs (genus level) and metabolites pairs identified from cull cow beef loins (*M. longissimus lumborum*) aged using the different aging methods for 28 days. (P-value <0.05, Rho > 0.8). Different aging treatments: Wet-aging (WA), Conventional dry-aging (DA), Dry-aging in water permeable bag (DWA) and UV-light dry-aging (UDA)

| Treatment | Metabolites                     | ASV                                                                                                                                                                                                                                                                                                                                                                                                                                                                                                                              |
|-----------|---------------------------------|----------------------------------------------------------------------------------------------------------------------------------------------------------------------------------------------------------------------------------------------------------------------------------------------------------------------------------------------------------------------------------------------------------------------------------------------------------------------------------------------------------------------------------|
| WA        | Acetyl-Lysine                   | <i>Acinetobacter</i> ASV1                                                                                                                                                                                                                                                                                                                                                                                                                                                                                                        |
|           | Deoxyfructosyl Tyrosine         | <i>Carnobacterium</i> , <i>Lactobacillus</i> , <i>Psychromonas</i>                                                                                                                                                                                                                                                                                                                                                                                                                                                               |
|           | Glutaminy-Glutamine             | <i>Aeromonas</i>                                                                                                                                                                                                                                                                                                                                                                                                                                                                                                                 |
|           | Heptanethiol                    | <i>Aeromonas</i>                                                                                                                                                                                                                                                                                                                                                                                                                                                                                                                 |
|           | Proline                         | <i>Flavobacterium</i> ASV2, <i>Massilia</i> , <i>Rothia</i> , <i>Shewanella</i> , Unclassified Gammaproteobacteria                                                                                                                                                                                                                                                                                                                                                                                                               |
|           | Tetraethylene glycol            | <i>Acinetobacter</i> ASV1                                                                                                                                                                                                                                                                                                                                                                                                                                                                                                        |
|           | Triethyl citrate                | <i>Carnobacterium</i> , <i>Lactobacillus</i> , <i>Psychromonas</i>                                                                                                                                                                                                                                                                                                                                                                                                                                                               |
| DA        | Estradiol quinone               | <i>Micrococcaceae</i> , <i>Mucor</i> , <i>Noccaea</i>                                                                                                                                                                                                                                                                                                                                                                                                                                                                            |
|           | Futoamide                       | <i>Micrococcaceae</i> , <i>Mucor</i> , <i>Noccaea</i>                                                                                                                                                                                                                                                                                                                                                                                                                                                                            |
|           | Glutaminy-Glutamine             | <i>Acinetobacter</i> ASV6, <i>Flavobacterium</i> ASV1<br><i>Actinomyces</i> , <i>Bacillus</i> ASV1, <i>Bacillus</i> ASV2, <i>Bacillus</i> ASV3, <i>Bifidobacterium</i> , <i>Chlorobi</i> , <i>Comamonadaceae</i> ASV1, <i>Comamonadaceae</i> ASV2, <i>Enterococcus</i> ASV2, <i>Enterococcus</i> ASV3, <i>Ferruginibacter</i> , <i>Geobacillus</i> , <i>Mesorhizobium</i> , <i>Metagenome</i> ASV1, <i>Metagenome</i> ASV2, <i>Microbacteriaceae</i> , <i>Proteiniphilum</i> , <i>Streptococcus</i> ASV2                         |
|           | Glutamyl-Histidine              | <i>Flavobacterium</i> ASV1, <i>Flavobacterium</i> ASV2, <i>Flavobacterium</i> ASV3, <i>Pedobacter</i> ASV2, <i>Staphylococcus</i> , <i>Vagococcus</i>                                                                                                                                                                                                                                                                                                                                                                            |
|           | Linalooloxide apiosyl-glucoside | <i>Acinetobacter</i> ASV6, <i>Flavobacterium</i> ASV1, <i>Pedobacter</i> ASV1<br><i>Actinomyces</i> , <i>Bacillus</i> ASV1, <i>Bacillus</i> ASV2, <i>Bacillus</i> ASV3, <i>Bifidobacterium</i> , <i>Chlorobi</i> , <i>Comamonadaceae</i> ASV1, <i>Comamonadaceae</i> ASV2, <i>Enterococcus</i> ASV2, <i>Enterococcus</i> ASV3, <i>Ferruginibacter</i> , <i>Geobacillus</i> , <i>Mesorhizobium</i> , <i>Metagenome</i> ASV1, <i>Metagenome</i> ASV2, <i>Microbacteriaceae</i> , <i>Proteiniphilum</i> , <i>Streptococcus</i> ASV2 |
|           | Methylenepoline                 | <i>Micrococcaceae</i> , <i>Mucor</i> , <i>Noccaea</i>                                                                                                                                                                                                                                                                                                                                                                                                                                                                            |
|           | Proline                         | <i>Micrococcaceae</i> , <i>Mucor</i> , <i>Noccaea</i>                                                                                                                                                                                                                                                                                                                                                                                                                                                                            |
|           | Phenylalanyl-Phenylalanine      | <i>Micrococcaceae</i> , <i>Mucor</i> , <i>Noccaea</i>                                                                                                                                                                                                                                                                                                                                                                                                                                                                            |
|           | Seryl-Isoleucine                | <i>Micrococcaceae</i> , <i>Mucor</i> , <i>Noccaea</i>                                                                                                                                                                                                                                                                                                                                                                                                                                                                            |
|           | Heptanethiol                    | <i>Chryseobacterium</i> , Unclassified Enterobacteriaceae                                                                                                                                                                                                                                                                                                                                                                                                                                                                        |
| DWA       | Hydroxypropyl-Hydroxyproline    | <i>Chryseobacterium</i> , Unclassified Enterobacteriaceae                                                                                                                                                                                                                                                                                                                                                                                                                                                                        |
|           | Oxoursadienoate                 | <i>Chryseobacterium</i> , Unclassified Enterobacteriaceae                                                                                                                                                                                                                                                                                                                                                                                                                                                                        |
|           | Tyromycic acid                  | <i>Chryseobacterium</i> , Unclassified Enterobacteriaceae                                                                                                                                                                                                                                                                                                                                                                                                                                                                        |
| UDA       | Glutaminy-Glutamine             | <i>Acinetobacter</i> ASV2, <i>Acinetobacter</i> ASV3, <i>Acinetobacter</i> ASV4, <i>Acinetobacter</i> ASV5, <i>Acinetobacter</i> ASV7, <i>Corynebacterium</i> ASV1, <i>Corynebacterium</i> ASV2, <i>Enterococcus</i> ASV1, <i>Granulicatella</i> , <i>Leuconostoc</i> , <i>Neisseria</i> , Unclassified Pasteurellaceae, <i>Phyllobacterium</i> , <i>Rothia</i> , <i>Streptococcus</i> ASV1, <i>Streptococcus</i> ASV3                                                                                                           |
|           | Lactoylglutathione              | <i>Acinetobacter</i> ASV2, <i>Acinetobacter</i> ASV3, <i>Acinetobacter</i> ASV4, <i>Acinetobacter</i> ASV5, <i>Acinetobacter</i> ASV7, <i>Corynebacterium</i> ASV1, <i>Corynebacterium</i> ASV2, <i>Enterococcus</i> ASV1, <i>Granulicatella</i> , <i>Leuconostoc</i> , <i>Neisseria</i> , Unclassified Pasteurellaceae, <i>Phyllobacterium</i> , <i>Rothia</i> , <i>Streptococcus</i> ASV1, <i>Streptococcus</i> ASV3                                                                                                           |

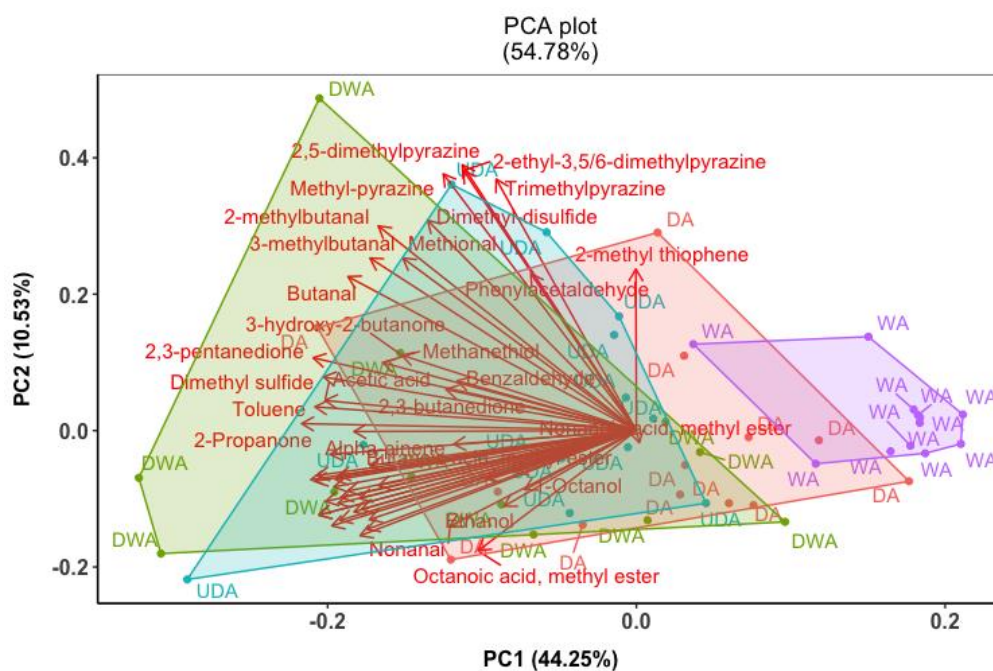

**Figure S1.** Principal component analysis (PCA) biplot of volatile compounds from cull cow beef loins (*M. longissimus lumborum*) aged with different aging methods [Wet aging (WA), Dry aging (DA), Dry aging in water-permeable bag (DWA) and UV-light dry-aging (UDA)].

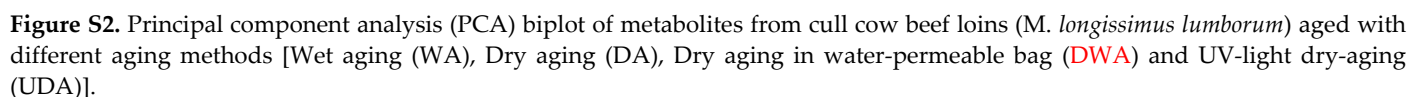



(a) Chao1 Richness Index

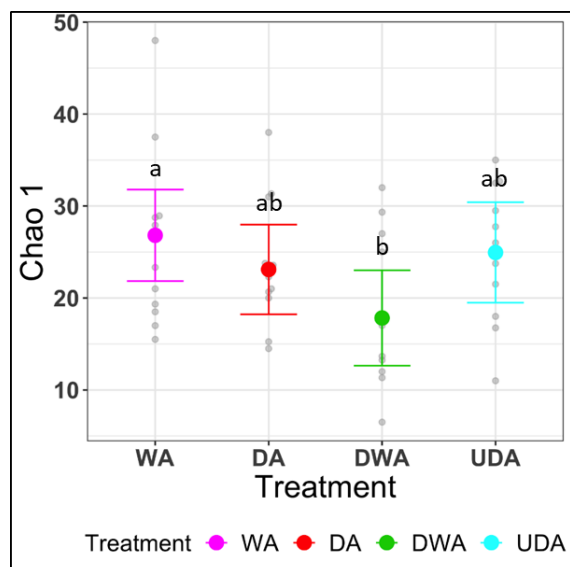

| Effect |                    | P-value |
|--------|--------------------|---------|
| Chao1  | Treatment          | 0.0284  |
|        | Source             | 0.3039  |
|        | Treatment x Source | 0.0549  |

(b) Pielou Evenness Index

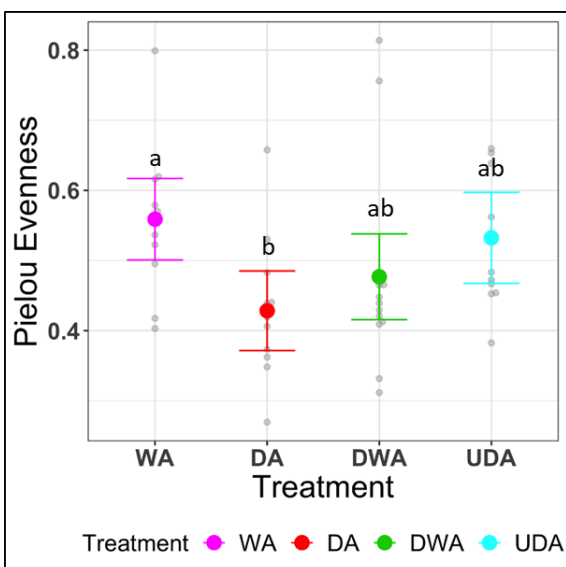

| Effect          |                    | P-value |
|-----------------|--------------------|---------|
| Pielou Evenness | Treatment          | 0.0099  |
|                 | Source             | 0.8893  |
|                 | Treatment x Source | 0.4027  |

(c) Faith Diversity Index

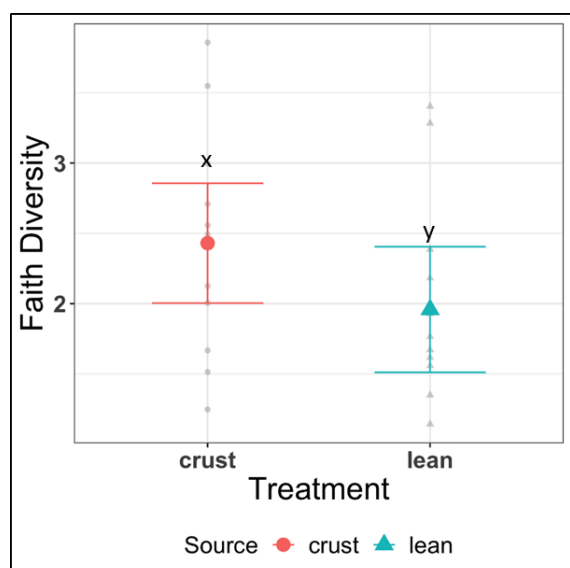

| Effect          |                    | P-value |
|-----------------|--------------------|---------|
| Faith Diversity | Treatment          | 0.1969  |
|                 | Source             | 0.0117  |
|                 | Treatment x Source | 0.1109  |

**Figure S3.** Microbiome alpha diversity index on microbial community collected from cull cow beef loins (*M. longissimus lumborum*) aged with different aging methods [Wet aging (WA), Dry aging (DA), Dry aging in water-permeable bag (DWA) and UV-light dry-aging (UDA)].

(a) Bray-Curtis Dissimilarity

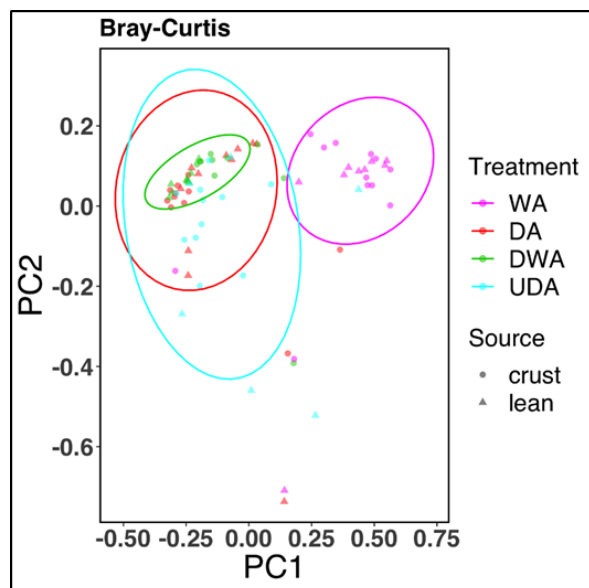

|                  | Effect             | P-value |
|------------------|--------------------|---------|
| Homogeneity Test | Treatment x Source | 0.467   |
| PERMANOVA Test   | Treatment          | 0.001   |
|                  | Source             | 0.092   |
|                  | Treatment x Source | 0.003   |

(b) Weighted Unifrac Distance

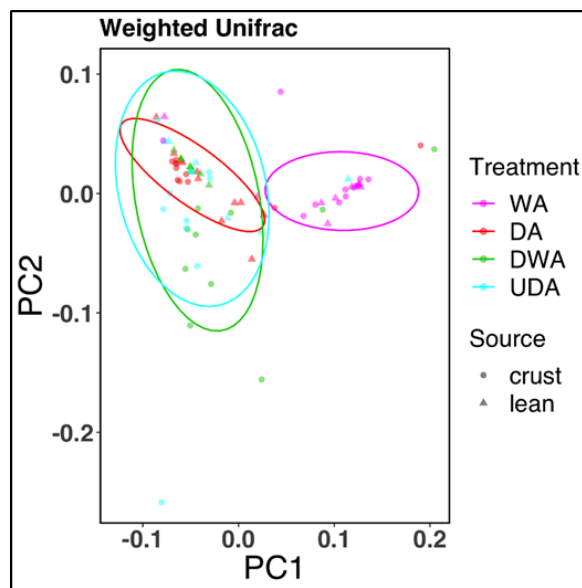

|                  | Effect             | P-value |
|------------------|--------------------|---------|
| Homogeneity Test | Treatment x Source | 0.059   |
| PERMANOVA Test   | Treatment          | 0.001   |
|                  | Source             | 0.024   |
|                  | Treatment x Source | 0.478   |

**Figure S4.** Microbiome beta diversity measures on microbial community collected from cull cow beef loins (*M. longissimus lumbo-rum*) aged with different aging methods [Wet aging (WA), Dry aging (DA), Dry aging in water-permeable bag (DWA) and UV-light dry-aging (UDA)].
